# Supplementary material for: A gamma fluorinated ether as an additive for enhanced oxygen activity in Li–O2 batteries
Source: Royal Society of Chemistry journal article supplement (doi:10.1039/c5ta03439f), 2015-01-01
Supplement: c5ta03439f1.pdf [file c5ta03439f1.pdf]

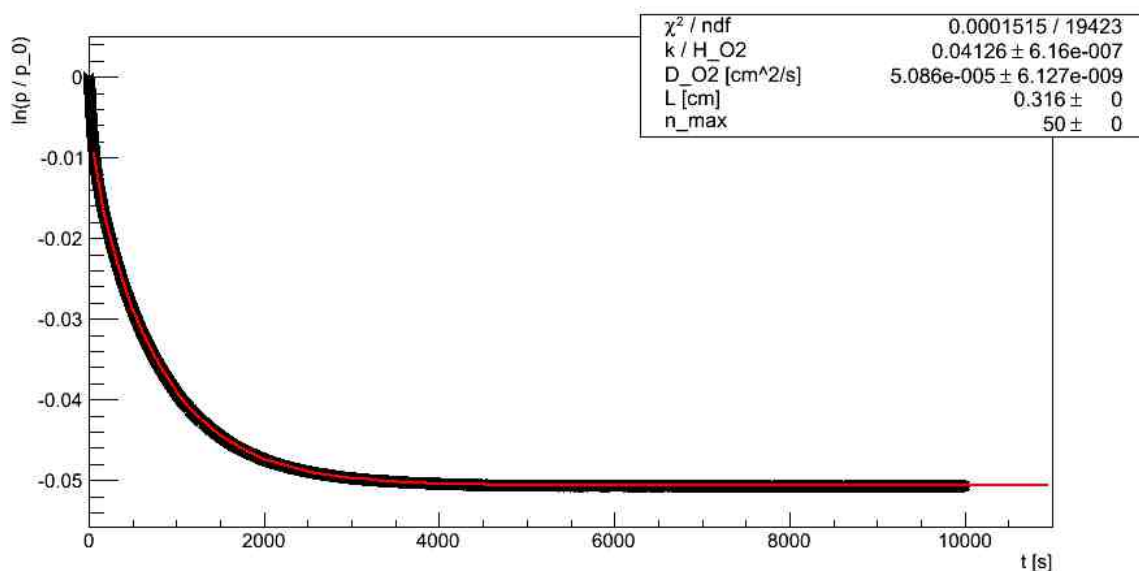

Figure S1: O<sub>2</sub> diffusion pressure decay as a function of time and the fit to determine the D<sub>O2</sub>

The fitting equation for the diffusion coefficient is obtained from the model developed by Hou et al. <sup>1</sup>

$$\ln\left(\frac{p(t)}{p_o}\right) = \left(\frac{k}{H_{O2}}\right) \sum_{n=0}^{\infty} \frac{1}{(2n+1)^2} \left\{ \exp\left(-\frac{(2n+1)^2 \pi^2 D_{o2} t}{4L^2}\right) - 1 \right\}$$

$$k = \frac{8RTV_{liq}\rho_{liq}}{\pi^2 V_{O2} M_{w,liq}}$$

|                                                      |                                          |
|------------------------------------------------------|------------------------------------------|
| $p(t)$ : Pressure drop at time t                     | $L$ : Height of liquid film              |
| $p_o$ : Pressure at start of the experiment          | $V_{liq}$ : Volume of the liquid         |
| $H_{O2}$ : Henry constant for oxygen in liquid       | $\rho_{liq}$ : Density of liquid         |
| $D_{O2}$ : Diffusion coefficient of oxygen in liquid | $M_{w,liq}$ : Molecular weight of liquid |
| $t$ : Time                                           | n= 20 (number of sums)                   |

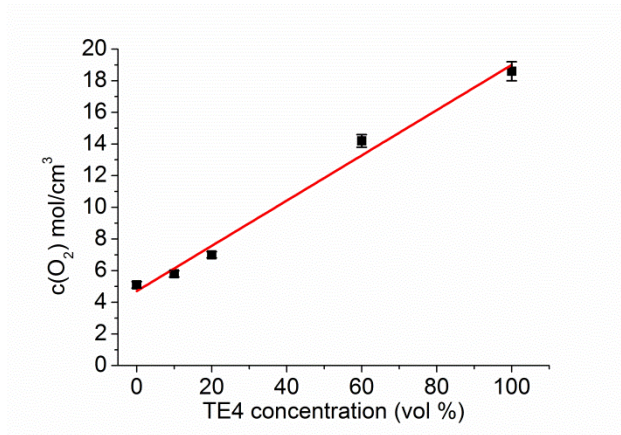

Figure S2: O<sub>2</sub> concentration as a function of TE4 additive percentage. Linear relation is observed between O<sub>2</sub> concentration increase and TE4 additive percentage

S3: Estimation of O<sub>2</sub> solubility for TE4 additive using method developed by Lawson et al.<sup>2</sup> and experimental data comparison

| Molecular breakdown | $\Delta E_v^{298}$ (cal mol <sup>-1</sup> ) | $\Delta V$ (cm <sup>3</sup> mol <sup>-1</sup> ) |
|---------------------|---------------------------------------------|-------------------------------------------------|
| 1 x CF <sub>3</sub> | 1933                                        | 54.8                                            |
| 3 x CF <sub>2</sub> | 2349                                        | 69.3                                            |
| 4 x CH <sub>2</sub> | 4720                                        | 64.4                                            |
| 1 x CH <sub>3</sub> | 1125                                        | 33.5                                            |
| 1 X -O- (ether)     | 8                                           | 19.0                                            |
| <b>Total</b>        | <b>10135</b>                                | <b>241</b>                                      |

Heat of vaporization at 25°C

$$\Delta H_v^{298} = \Delta E_v^{298} + RT = 10135 \frac{\text{cal}}{\text{mol}} + \frac{1.987 \text{ cal}}{\text{mol K}} \times 298 \text{ K} = 10727 \frac{\text{cal}}{\text{mol}}$$

Entropy of vaporization at 25°C

$$\Delta S_v^{298} = \frac{\Delta H_v^{298}}{T} = \frac{10727 \text{ cal/mol}}{298 \text{ K}} = 36 \frac{\text{cal}}{\text{mol K}}$$

Molar volume of O<sub>2</sub> for open chain compound

$$V_{O_2} = -19.85 + 15.90 \ln \Delta S_v^{298} = 37.12 \frac{\text{cm}^3}{\text{mol}}$$

Mol fraction of O<sub>2</sub>

$$\ln x_{O_2} = \ln x_{O_2}^i - \frac{\bar{V}_{O_2}(\delta - \delta_{O_2})^2}{RT} - \left[ \ln(\bar{V}_{O_2}/V) + \left(1 - \frac{\bar{V}_{O_2}}{V}\right) \right]$$

With  $x_{O_2}^i = 17.638 \times 10^{-4}$  and  $\delta_{O_2} = 5.7 \text{ cal/cm}^3$

$$\ln x_{O_2} = \ln 17.638e^{-4} - \frac{37.12(6.48 - 5.7)^2}{592} - \left[ \ln(37.12/241) + \left(1 - \frac{37.12}{241}\right) \right]$$

$$\ln x_{O_2} = -5.354$$

$$x_{O_2} = 4.7 \times 10^{-3}$$

Estimated  $\text{cm}^3 \text{O}_2 / 100 \text{ mL liquid}$

$$\frac{\text{cm}^3 \text{O}_2}{100 \text{ mL liquid}} = \frac{100 \times x_{O_2} \times 24465}{V} = 47.71$$

Experimental result  $\text{cm}^3 \text{O}_2 / 100 \text{ mL liquid}$

$$\begin{aligned} \frac{\text{cm}^3 \text{O}_2}{100 \text{ mL liquid}} &= TE4 H_{O_2} \times 1 \text{ bar} \times \text{molar Volume } O_2 @ 25C, 1 \text{ bar} \times 100 \text{ mL} = 18.6 \text{ mol m}^{-3} \\ &\times 24.43 \frac{\text{L}}{\text{mol}} = 45.43 \pm 0.15 \end{aligned}$$

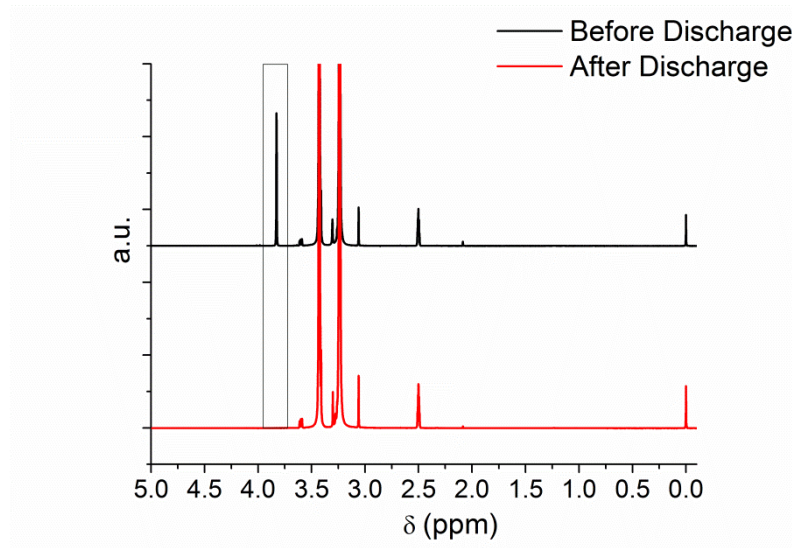

Figure S4:  $^1\text{H}$  NMR of 0.1 M  $\text{LiClO}_4$ :DME+20 vol% 1-methoxyheptafluoropropane (alpha fluorinated additive) before discharge and after discharge at  $100 \text{ mA g}^{-1}$  up to 2V

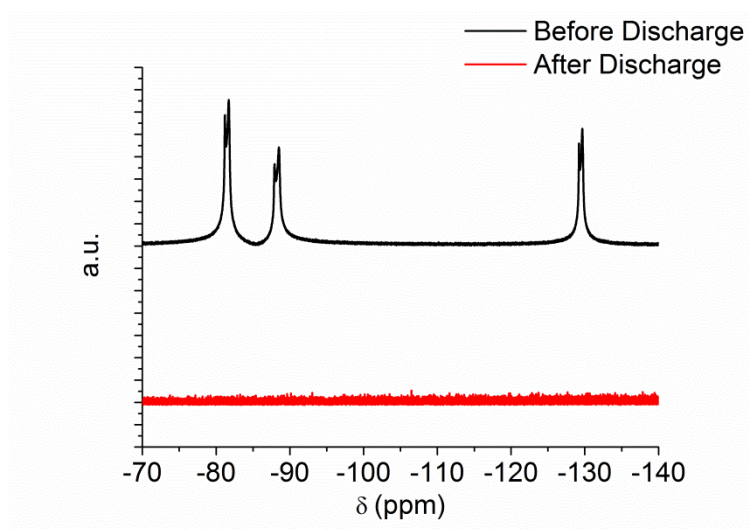

Figure S5:  $^{19}\text{F}$  NMR of 0.1 M  $\text{LiClO}_4$ :DME+20 vol% 1-methoxyheptafluoropropane (alpha fluorinated additive) before discharge and after discharge at  $100 \text{ mA g}^{-1}$  up to 2V

S6 The assignment of the signal for the  $^1\text{H}$  NMR and  $^{19}\text{F}$  NMR of TE4 additive:

The assignment for the  $^1\text{H}$  NMR peak of TE4 additive is as follow (400MHz,  $\text{CDCl}_3$ , RT)  $\delta = 3.87\text{-}3.79$  ( $\text{CH}_2\text{-O}$ , m, 2H),  $3.51\text{-}3.44$  ( $\text{O-CH}_2$ , m, 2H)  $2.48\text{-}2.32$  ( $\text{CH}_2\text{-CF}_2$ , m, 2H) , $1.60$  ( $\text{CH}_2\text{-CH}_3$ ,m, 2H)  $0.92$  ( $\text{CH}_3$ , t, 3H). The assignment for the  $^{19}\text{F}$  NMR peak of TE4 additive is as follow: (300MHz,  $\text{DMSO-d}_6$ , RT)  $\delta = -78.93$  ( $\text{CF}_3\text{-S}$ , s ,6F),  $-80.94$  ( $\text{CF}_3$ , s, 3F),  $-112.99$  ( $\text{CF}_2\text{-CH}_2$ , s, 2F),  $-124.31$  ( $\text{CF}_2$ , s, 2F),  $-129.19$  ( $\text{CF}_2\text{-CF}_3$ , s, 2F).

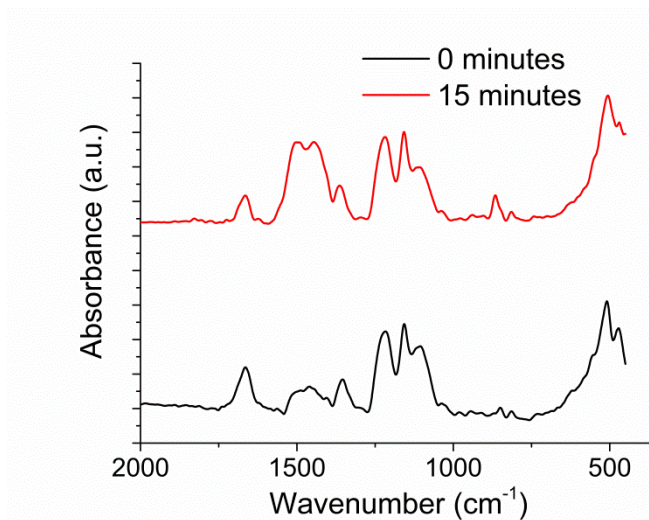

Figure S7: FTIR spectra of cathode discharged using 0.1 M LiTFSI:TEGDME+20 vol % TE4 electrolyte. The measurements were taken at 0 minutes and after 15 minutes of exposure to the air

## References

- 1 H. Ying and R. E. Baltus, *Ind. Eng. Chem. Res.*, 2007, **46**, 8166.
- 2 D. D. Lawson, J. Moacanin, K. V. Scherer, T. F. Terranova and J. D. Ingham, *J. Fluor. Chem.*, 1978, **12**, 221.
